# Supplementary figures and images for: Development of a fluorescence-linked immunosorbent assay for detection of avermectins using a fluorescent single-domain antibody
Source: Royal Society of Chemistry journal article supplement (doi:10.1039/c5ay00305a), 2015-01-01

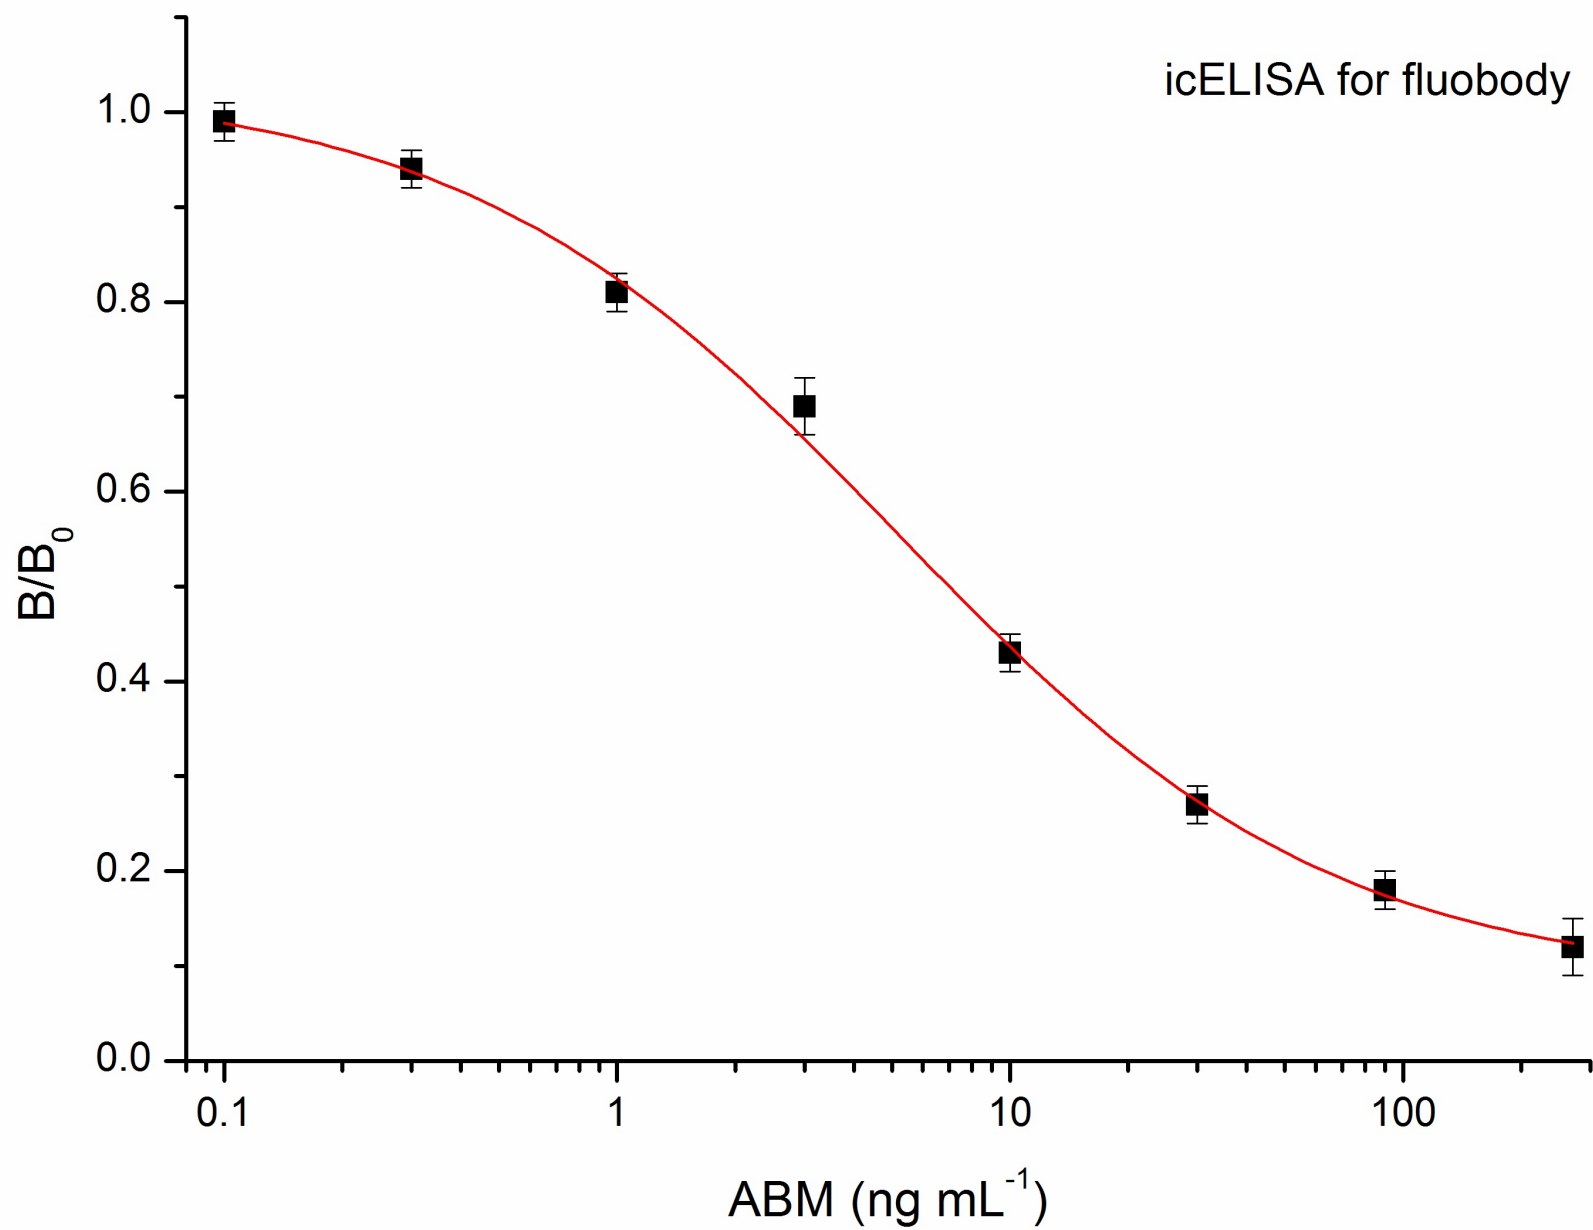

Supplement: c5ay00305a1.pdf [file c5ay00305a1.pdf]
